# Supplementary material for: Accessibility of the unstructured α-tubulin C-terminal tail is controlled by microtubule lattice conformation
Source: eLife journal article supplement (doi:10.7554/elife.109308), 2025-10-31

## Blot PA-TubA1A

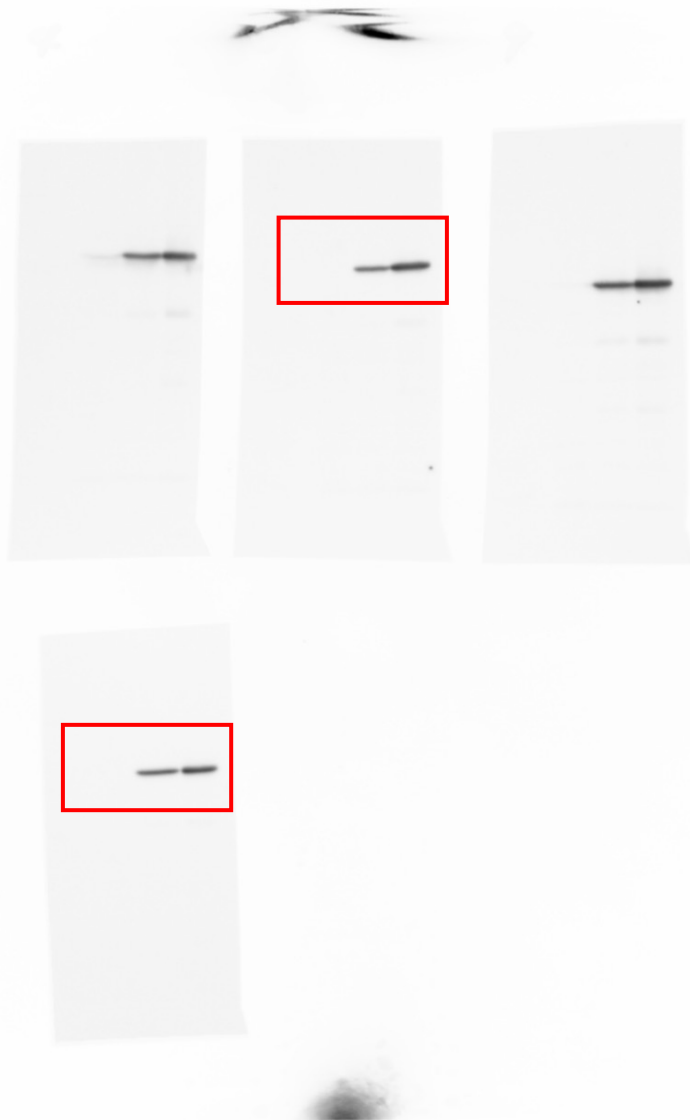

## Blot total $\alpha$ -tubulin

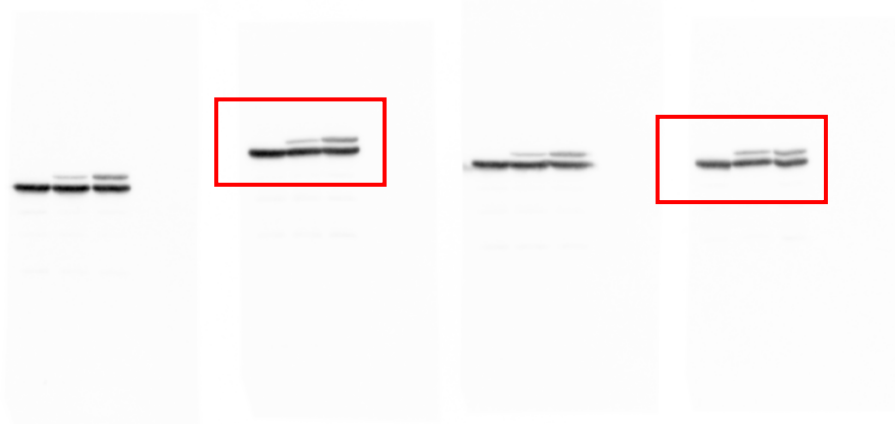

## Blot Y- $\alpha$ -tubulin

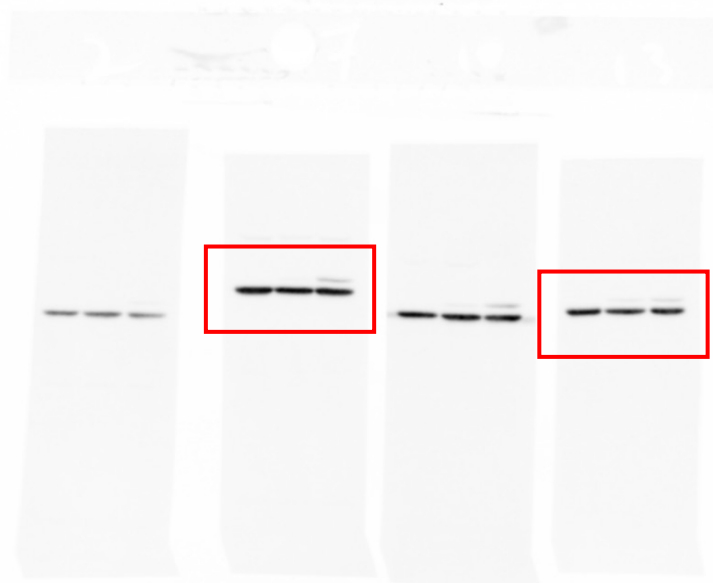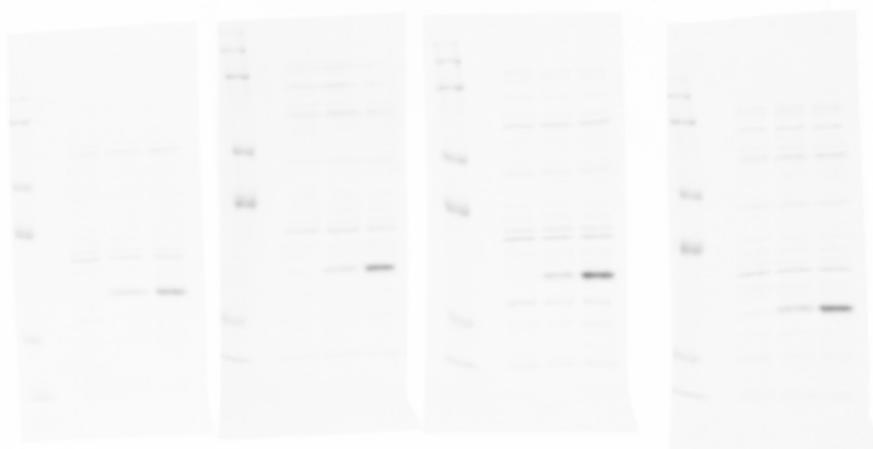

# Blot Tag-RFP

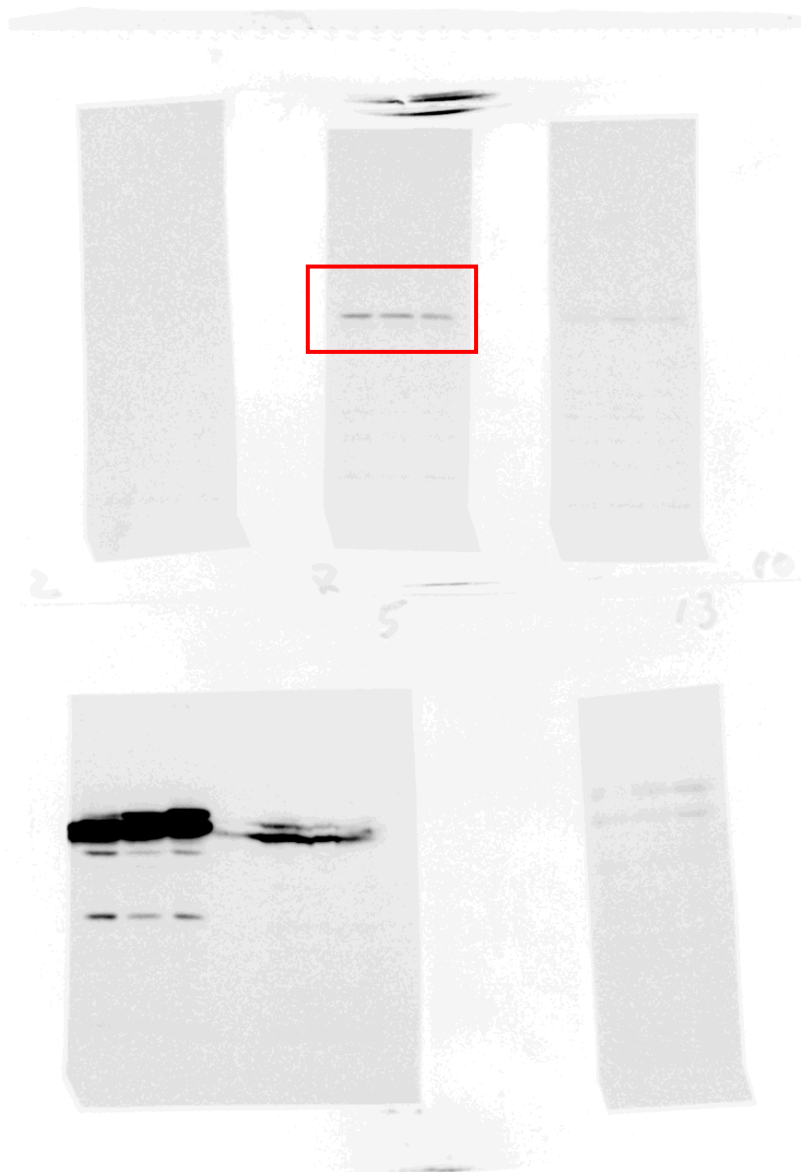

## Blot mScarlet3

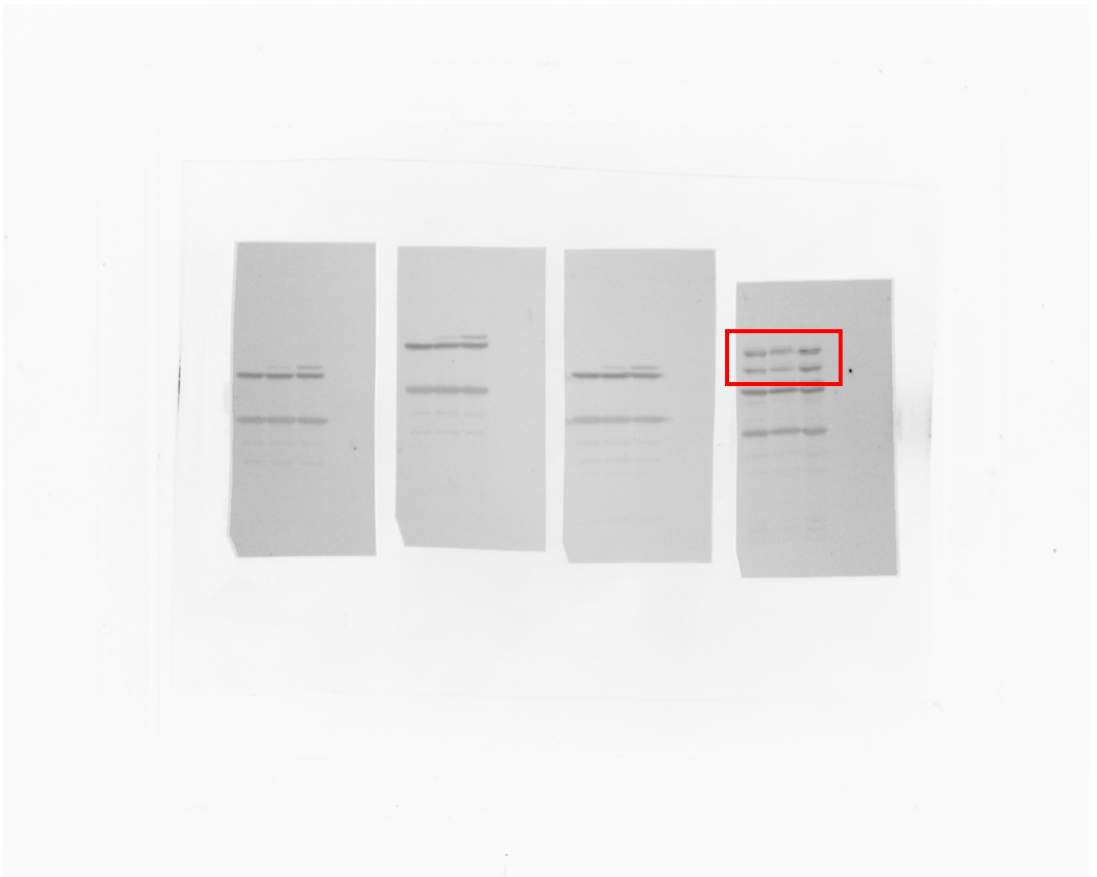

## Blot GAPDH

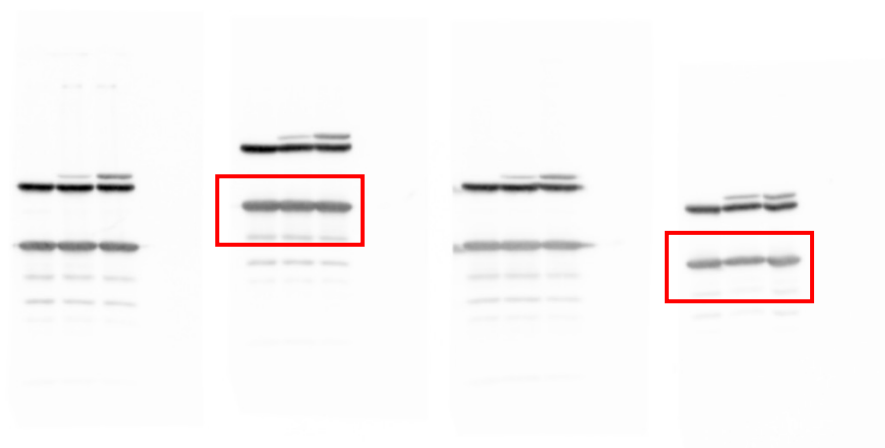

Supplement: fig5-figsupp1-data1 [file Fig5-FigSupp1-sourcedata1-labelled.pdf › Figure5-FigSupp1-sourcedata1-labelled/Fig5-FigSupp1-sourcedata1-labelled.pdf]
