# Supplementary material for: Accessibility of the unstructured α-tubulin C-terminal tail is controlled by microtubule lattice conformation
Source: eLife. 2026 Feb 9;14:RP109308. doi: 10.7554/eLife.109308 (PMC12885479; doi:10.7554/eLife.109308)
Supplement: Figure 2—source data 1. [file elife-109308-fig2-data1.xlsx]

## Sheet: Sheet1
Fig2BCD_DMSO A1aY1				Fig2BCD_Taxol Al1Y1				Fig2FGH_DMSO CAPGLy				Fig2BCD_Taxol CAPGLy
Before	After	Ratio		Before	After	After/Before		Before	After	Ratio		before	after	Ratio
18.4338	17.6323	0.956519		3.64766	10.9823	3.01079		3.10836	3.09326	0.995143		3.03386	4.14482	1.36619
9.25814	3.88029	0.419122		6.50414	5.12825	0.788459		4.43249	4.55135	1.02681		2.70739	4.26566	1.57556
6.36312	5.7913	0.910135		7.07457	3.48335	0.492377		2.25953	1.96199	0.868315		3.68283	5.08671	1.3812
6.7439	6.01495	0.891909		0.924094	3.57883	3.8728		1.57516	1.32173	0.839108		3.99589	5.13346	1.28468
5.69508	4.22103	0.741172		2.6179	3.6616	1.39868		3.40852	3.71065	1.08864		3.08891	4.95946	1.60557
3.29307	4.40733	1.33836		1.32428	1.12965	0.853026		2.68935	2.10133	0.781351		2.70837	4.2688	1.57615
7.38857	5.83689	0.78999		8.22699	14.038	1.70633		4.03575	3.6667	0.908555		2.98169	4.62797	1.55213
7.97442	5.12518	0.642703		6.40526	12.4059	1.93684		3.22607	2.65964	0.824419		3.69416	4.98232	1.3487
15.6759	18.92	1.20695		6.22141	13.0297	2.09434		2.50873	2.90187	1.15671		2.80538	5.30563	1.89124
0.250664	0.241322	0.962732		6.14	9.86505	1.60669		2.69633	2.46417	0.913898		3.88637	4.63528	1.1927
0.43502	0.21264	0.488806		8.9287	9.85424	1.10366		1.31832	1.33575	1.01322		4.08693	6.12441	1.49853
2.44444	2.03007	0.830487		7.4753	14.4868	1.93795		2.00351	2.07048	1.03343		2.3946	4.01632	1.67724
0.208754	0.0521884	0.249999		8.84455	11.6626	1.31862		2.08353	2.18244	1.04748		2.86459	5.1666	1.80361
1.32378	0.97885	0.739436		6.25439	10.8899	1.74117		1.589	1.49933	0.943566		3.54429	4.96754	1.40156
1.72745	1.31536	0.761446		7.60111	13.1303	1.72741		2.69255	2.71156	1.00706		2.88722	5.09023	1.76302
0.39527	0.0988178	0.250001		19.3435	20.0029	1.03409		2.50503	2.58585	1.03226		2.85684	4.9131	1.71977
0.359247	0.515004	1.43356		21.1155	20.0732	0.950636		2.62786	2.00739	0.763887		3.81628	5.80668	1.52156
0.946677	0.869276	0.918239		1.99555	6.81235	3.41377		1.88557	1.75021	0.928213
2.40525	1.55339	0.645833		4.98317	10.7286	2.15297		2.18289	3.00153	1.37503
1.20027	0.665382	0.554358		3.13066	4.05835	1.29632		2.88101	2.3941	0.830992
2.66248	1.72924	0.649485		16.4629	18.2805	1.11041		2.75791	2.96846	1.07635
2.51642	1.3515	0.537072		7.4984	9.63882	1.28545		3.30169	2.91613	0.883224
0.455382	0.46064	1.01155		19.8087	22.0243	1.11185		3.26588	3.02497	0.926232
1.89651	1.37974	0.727515		10.5219	11.7384	1.11561		1.31373	1.35242	1.02945
1.08523	2.09214	1.92784		12.3759	17.1957	1.38945		2.38177	1.96373	0.824482
7.59173	6.80262	0.896057		20.2753	20.615	1.01676		2.66247	2.22528	0.835794
8.47986	10.3662	1.22245		21.9047	21.4391	0.978744		2.41271	2.46713	1.02256
2.34786	2.87216	1.22331		12.907	11.88	0.920434		2.08189	2.00892	0.964949
4.0205	5.57433	1.38648		21.2659	21.7058	1.02069
				16.1939	15.8887	0.981154
				21.2118	23.3417	1.10041
				18.4516	19.0212	1.03087
				19.5557	21.4424	1.09648
				23.3435	22.0168	0.943164
				20.2045	21.6837	1.07321
				16.831	11.9909	0.712429
				18.2931	17.3551	0.948722
				21.2376	22.3303	1.05145
				20.3133	20.7782	1.02289
				20.3566	21.1954	1.04121
				8.74423	10.2646	1.17387
				11.4563	16.5543	1.445
				16.1445	19.9498	1.23571
				19.5471	21.2759	1.08844
				18.259	19.0127	1.04128
				4.34977	3.61718	0.831579
				19.4349	19.6388	1.01049
				19.1412	20.5551	1.07387
				18.3456	20.1073	1.09602
				19.7928	20.225	1.02184
				18.1601	20.9449	1.15335
				5.33384	11.4148	2.14006
				1.9269	8.0961	4.20162
				2.06857	6.50619	3.14525
				10.9389	11.0657	1.0116
				10.2505	12.28	1.19799
				0.857009	1.72791	2.0162
				2.80584	7.35051	2.61972
				4.54711	8.50586	1.87061
