# Supplementary material for: Accessibility of the unstructured α-tubulin C-terminal tail is controlled by microtubule lattice conformation
Source: eLife. 2026 Feb 9;14:RP109308. doi: 10.7554/eLife.109308 (PMC12885479; doi:10.7554/eLife.109308)
Supplement: Figure 3—source data 1. [file elife-109308-fig3-data1.xlsx]

## Sheet: Sheet1
Fig3C_TOS-A1aY1								Fig3D_TOS-CAPGly
TubA	Tau	MAP2	Kif5C rigor	CAMSAP2	CAMSAP3	MAP7		TubA	Tau	MAP2	Kif5C rigor	CAMSAP2	CAMSAP3	MAP7
0.1	0.081	-0.348	0.549	0.201	0.163	0.009		0.412	0.147	0.357	0.662	0.168	0.413	0.736
0.114	-0.684	-0.668	0.561	0.272	0.192	-0.63		0.439	0.367	0.249	0.669	0.269	0.476	0.718
0.221	0.069	-0.781	0.494	0.565	0.189	0.147		0.409	0.024	0.402	0.343	0.457	0.4	0.724
0.085	0.053	0.16	0.324	0.391	0.282	0.405		0.263	0.381	0.221	0.39	0.2	0.598	0.442
0.003	0.075	0.027	0.345	0.503	0.119	0.104		0.138	0.35	0.224	0.45	0.246	0.503	0.525
0.34	0.109	-0.157	0.475	0.438	0.249	0.415		0.174	0.347	0.231	0.674	0.363	0.565	0.326
0.075	0.016	0.15	0.549	0.252	0.242	0.147		0.342	0.267	0.478	0.627	0.424	0.63	0.55
0.107	0.057	-0.127	0.462	0.389	0.236	0.337		0.405	0.36	0.342	0.397	0.233	0.647	0.425
-0.589	-0.113	0.012	0.261	0.368	0.377	0.093		0.128	0.324	0.153	0.386	0.494	0.721	0.742
0.328	0.109	0.021	0.496	0.254	0.289	0.203		0.264	0.055	0.349	0.288	0.399	0.554	0.443
0.326	-0.366	0.097	0.387	0.282	0.336	0.168		0.096	0.421	0.399	0.703	0.027	0.453	0.901
0.301	0.076	0.312	0.524	0.219	0.207	0.151		0.424	0.294	0.437	0.546	0.221	0.425	0.455
-0.469	0.058	0.025	0.39	0.496	0.207	0.182		0.223	0.455	0.209	0.663	0.248	0.56	0.624
0.12	0.12	0.298	0.393	0.3	0.38	0.247		0.331	0.559	0.216	0.623	0.426	0.527	0.685
0.106	-0.259	-0.672	0.422	0.296	0.234	0.229		0.391	0.471	0.248	0.377	0.274	0.455	0.654
0.084	0.288	-0.43	0.435	0.358	0.359	0.419		0.275	0.325	0.384	0.414	0.444	0.399	0.723
0.02	0.267	0.044	0.486	0.318	0.333	0.3		0.186	0.38	0.411	0.606	0.41	0.63	0.794
-0.053	0.097	0.057	0.433	0.359	0.414	0.401		0.37	0.436	0.29	0.62	0.33	0.689	0.819
0.055	0.093	-0.495	0.522	0.277	0.38	-0.516		0.372	0.543	0.132	0.302	0.213	0.581	0.62
0.052	-0.247	0.06	0.53	0.333	0.432	0.248		0.334	0.404	0.352	0.517	0.246	0.571	0.362
0.048	-0.48	0.159	0.17	0.071	0.216	0.24		0.288	0.363	0.306	0.519	0.361	0.52	0.333
0.014	0.098	0.148	0.293	0.432	0.181	0.109		0.401	0.244	0.313	0.614	0.304	0.676	0.481
0.077	-0.213	0.098	0.324	0.376	0.13	0.141		0.401	0.296	0.437	0.645	0.21	0.611	0.697
0.121	-0.225	0.026	0.589	0.291	0.295	0.107		0.424	0.354	0.454	0.579	0.306	0.59	0.653
-0.29	-0.839	-0.499	0.254	0.242	0.085	0.353		0.379	0.351	0.449	0.505	0.236	0.389	0.395
0.099	0.158	-0.225	0.342	0.309	0.336	0.182		0.152	0.255	0.27	0.267	0.204	0.261	0.725
0.326	0.04	-0.119	0.505	0.482	0.407	0.01		0.152	0.288	0.322	0.26	0.311	0.411	0.482
0.264	0.052	0.031	0.609	0.233	0.29	0.077		0.345	0.132	0.283	0.452	0.469	0.452	0.63
-0.377	0.135	0.037	0.43	0.385	0.156	0.375		0.226	0.179	0.258	0.41	0.267	0.501	0.53
0.151	0.026	0.012	0.4	0.375	0.285	0.214		0.245	0.326	0.25	0.41	0.295	0.471	0.593
0.164	-0.1	-0.523	0.534	0.645	0.201	0.191		0.327	0.202	0.565	0.324	0.313	0.302	0.71
0.182	0.229	0.056	0.403	0.489	0.454	0.285		0.365	0.34	0.328	0.505	0.306	0.222	0.737
0.189	0.278	0.008	0.386	0.46	0.361	0.244		0.433	0.297	0.184	0.672	0.469	0.356	0.655
0.067	0.05	-0.453	0.341	0.461	0.592	0.189		0.14	0.264	0.448	0.512	0.329	0.393	0.849
0.11	0.12	-0.785	0.493	0.28	0.398	0.219		0.13	0.254	0.435	0.32	0.373	0.449	0.595
0.037	-0.578	0.027	0.472	0.412	0.456	0.467		0.484	0.145	0.064	0.457	0.38	0.303	0.659
0.139	-0.755	-0.219	0.569	0.651	0.354	0.281		0.301	0.411	0.271	0.346	0.352	0.502	0.713
0.132	0.084	0.111	0.512	0.373	0.499	0.454		0.376	0.328	0.447	0.178	0.32	0.661	0.5
0.029	0.065	-0.347	0.508	0.336	0.284	0.342		0.43	0.214	0.407	0.527	0.533	0.626	0.598
0.098	-0.344	-0.35	0.24	0.424	0.418	0.072		0.472	0.169	0.135	0.642	0.394	0.654	0.684
0.107	-0.408	-0.439	0.296	0.325	0.079	-0.541		0.389	0.252	0.178	0.579	0.117	0.54	0.599
0.138	0.133	-0.358	0.595	0.362	0.006	0.462		0.177	0.168	0.259	0.479	0.351	0.637	0.277
0.301	-0.242	0.159	0.452	0.38	0.407	0.484		0.418	0.366	0.313	0.541	0.26	0.461	0.738
0.07	-0.086	0.164	0.361	0.56	0.257	0.04		0.331	0.347	0.203	0.535	0.384	0.65	0.627
-0.264	-0.797	-0.712	0.452	0.093	0.255	0.081		0.368	0.258	0.218	0.551	0.235	0.519	0.439
0.105	0.023	0.007	0.345	0.438	0.343	0.261		0.215	0.365	0.273	0.499	0.419	0.584	0.554
0.104	0.147	-0.292	0.234	0.283	0.162	0.353		0.127	0.351	0.233	0.505	0.252	0.609	0.53
0.066	0.038	-0.238	0.248	0.411	0.21	0.279		0.35	0.398	0.159	0.554	0.256	0.415	0.757
0.034	0.137	-0.241	0.338	0.484	0.261	0.146		0.414	0.338	0.35	0.379	0.472	0.609	0.538
0.016	0.008	0.052	0.444	0.337	0.349	0.046		0.264	0.317	0.281	0.5	0.292	0.436	0.546
0.101	-0.049	0.028	0.319		0.558	-0.064		0.297	0.337	0.247	0.613	0.323	0.557	0.626
0.081	0.243	-0.257	0.424		0.389	0.169		0.204	0.215	0.244	0.632	0.322	0.404	0.63
0.083	0.304	-0.268	0.342		0.315	0.339		0.37	0.311	0.469	0.243	0.409	0.3	0.233
0.12	0.039	0.078	0.478		0.214	0.461		0.275	0.366	0.053	0.402	0.278	0.166	0.67
0.18	0.109	0.058	0.303		0.392	0.348		0.272	0.365	0.578	0.471	0.424	0.386	0.154
0.161	-0.557	0.028	0.292		0.34			0.349	0.494	0.093	0.492	0.318	0.465	0.647
0.225	-0.832	-0.899	0.376					0.291	0.146	0.015	0.388	0.32	0.378	0.586
-0.239		-0.84	0.364					0.155	0.318	0.144	0.419	0.127	0.505
0.061		0.037	0.397					0.369	0.348	0.124	0.339	0.154	0.518
0.292		0.128	0.251					0.302	0.315	0.414	0.465	0.408	0.552
0.157		0.191	0.393					0.313	0.367	0.387	0.55	0.318	0.369
0.107		-0.242	0.347					0.286			0.644	0.379	0.401
0.103		0.032	0.385								0.69		0.354
0.081		-0.738	0.477								0.494		0.556
0.269		0.036	0.46								0.683		0.502
0.177		0.305	0.423								0.473		0.429
0.11			0.35								0.434		0.401
0.043			0.289								0.418		0.594
0.38			0.515								0.582		0.501
			0.43								0.645		0.534
											0.511		0.598
											0.529
											0.562
											0.35
											0.514
											0.261
