# Supplementary material for: Accessibility of the unstructured α-tubulin C-terminal tail is controlled by microtubule lattice conformation
Source: eLife. 2026 Feb 9;14:RP109308. doi: 10.7554/eLife.109308 (PMC12885479; doi:10.7554/eLife.109308)
Supplement: Figure 4—source data 1. [file elife-109308-fig4-data1.xlsx]

## Sheet: Sheet1
Fig4B_intensity dY							Fig4C_TOS dY
Tau	MAP2	Kif5C rigor	CAMSAP2	CAMSAP3	MAP7		Tau	MAP2	Kif5C rigor	CAMSAP2	CAMSAP3	MAP7
0.200695	0.21374	0.779128	0.605322	0.168926	1.24156		0.112	0.079	0.434	0.468	0.51	0.516
0.113053	0.274275	1.68221	0.558634	0.642013	0.685465		0.062	0.043	0.438	0.459	0.349	0.498
0.083006	0.308671	0.961135	0.367747	0.230235	0.555115		0.047	0.06	0.455	0.263	0.78	0.644
0.0727082	0.258175	0.902667	0.476236	0.53705	1.00703		0.102	0.14	0.55	0.331	0.65	0.602
0.077696	0.221637	2.05622	0.210211	0.978433	0.869727		0.045	0.049	0.579	0.214	0.74	0.471
0.0398207	0.214265	2.22741	0.712966	0.582478	0.310775		0.045	0.065	0.605	0.415	0.332	0.595
0.102984	0.313059	0.650775	0.74838	0.35427	0.737417		0.115	0.108	0.587	0.49	0.66	0.528
0.129655	0.206812	1.78317	1.10685	0.294886	0.612706		0.098	0.126	0.571	0.179	0.458	0.546
0.241998	0.199136	0.960425	0.274405	0.212864	1.08488		0.049	0.124	0.654	0.206	0.324	0.823
0.213601	0.3232	1.461	0.350887	0.799831	0.703112		0.138	0.081	0.585	0.435	0.588	0.716
0.0973913	0.291036	1.3685	0.741728	1.16196	0.48022		0.275	0.102	0.64	0.329	0.668	0.574
0.171822	0.226583	2.3604	0.518941	0.754845	3.63218		0.061	0.122	0.548	0.347	0.593	0.737
0.0899047	0.190729	1.7365	0.594356	0.364317	1.51607		0.11	0.113	0.642	0.397	0.191	0.482
0.106012	0.228215	1.6554	0.700981	1.01244	1.13541		0.048	0.065	0.662	0.412	0.592	0.687
0.31104	0.345659	1.58652	0.497163	1.24896	0.933971		0.057	0.105	0.697	0.455	0.729	0.417
0.19877	0.272784	1.96943	0.0537538	0.48356	0.665745		0.157	0.171	0.545	0.35	0.434	0.437
0.234427	0.375696	1.6637	0.520201	0.485284	0.739955		0.096	0.158	0.581	0.189	0.41	0.376
0.150174	0.266549	1.06547	0.529545	0.535091	0.807875		0.169	0.096	0.6	0.354	0.316	0.411
0.0502894	0.277222	1.2668	0.368501	0.722103	1.31685		0.099	0.108	0.564	0.167	0.661	0.469
0.158433	0.179091	0.956657	0.46096	0.846685	1.13997		0.054	0.068	0.605	0.178	0.671	0.383
0.194292	0.0229205	0.624752	0.210048	0.374338	0.729724		0.094	0.131	0.557	0.51	0.548	0.588
0.131497	0.0204879	0.588812	0.0930072	0.506557	0.72161		0.165	0.094	0.533	0.329	0.68	0.648
0.0393131	0.187626	0.933985	0.126706	0.397031	0.892818		0.072	0.048	0.648	0.366	0.34	0.59
0.036813	0.210537	1.25134	0.372452	0.389804	0.464315		0.15	0.051	0.68	0.266	0.652	0.504
0.0707043	0.211457	1.41868	0.614059	0.350668	0.721856		0.052	0.086	0.508	0.286	0.498	0.464
0.153897	0.180068	0.919264	0.279957	0.514229	0.395477		0.1	0.058	0.399	0.32	0.586	0.549
0.0596083	0.151257	1.43302	0.443732	0.252665	0.424814		0.216	0.054	0.395	0.324	0.434	0.442
0.233628	0.118988	0.33276	0.449782	0.52342	0.288531		0.422	0.077	0.47	0.307	0.392	0.344
0.185064	0.135448	1.44255	0.493476	0.326442	0.543294		0.16	0.022	0.624	0.491	0.32	0.593
0.132758	0.0914801	0.795289	0.507103	0.153034	0.869989		0.089	0.054	0.663	0.32	0.652	0.52
0.104149	0.142843	2.65449	0.902819	0.333498	0.792632		0.077	0.146	0.589	0.362	0.681	0.389
0.163653	0.091591	2.59992	0.305488	0.276283	0.391747		0.11	0.069	0.677	0.455	0.546	0.622
0.179361	0.191849	2.05583	0.974696	0.319777	1.35862		0.105	0.089	0.6	0.404	0.647	0.57
0.0628942	0.136887	3.20824	0.503893	0.240573	0.887754		0.075	0.099	0.543	0.475	0.47	0.476
0.0635379	0.0473555	1.79592	0.640146	0.208451	0.237113		0.066	0.036	0.603	0.577	0.486	0.386
0.103647	0.125426	1.74285	1.48835	0.264782	0.223582		0.043	0.125	0.687	0.315	0.347	0.412
0.0709275	0.0883751	0.931318	1.01445	0.141201	0.397126		0.16	0.131	0.588	0.258	0.581	0.365
0.105504	0.250053	0.994859	0.334762	0.645361	0.320792		0.126	0.197	0.592	0.466	0.374	0.404
0.0907106	0.158242	0.620973	0.300941	0.388035	0.22738		0.072	0.118	0.633	0.447	0.616	0.464
0.0515716	0.125246	0.767122	0.979617	0.461367	1.15779		0.077	0.009	0.578	0.43	0.582	0.57
0.137665	0.163277	1.74681	1.64768	1.44134	0.534777		0.047	0.047	0.606	0.279	0.72	0.275
0.0459789	0.139955	0.742944	0.637991	0.669153	0.682053		0.065	0.064	0.596	0.485	0.59	0.364
0.13866	0.117831	0.900981	0.718259	0.230639	0.803287		0.064	0.024	0.436	0.342	0.517	0.375
0.111273	0.271012	1.0064	0.705531	0.456583	0.303136		0.07	0.068	0.503	0.553	0.428	0.354
0.0541595	0.188926	0.362903	0.548056	0.912634	1.46845		0.052	0.05	0.414	0.435	0.605	0.503
0.0711629	0.15133	0.551452	0.743488	0.898779	0.911214		0.089	0.093	0.437	0.282	0.758	0.636
0.0546936	0.143526	0.674948	1.08134	0.171248	0.557679		0.105	0.108	0.53	0.49	0.63	0.612
0.0722886	0.113308	0.582448	0.413256	0.670914	0.953022		0.069	0.131	0.647	0.406	0.296	0.196
0.0494801	0.0699591	0.66076	0.592546	0.100839	0.336052		0.078	0.08	0.618	0.43	0.4	0.628
0.0581502	0.0902131	0.82789	1.07597	0.135442	0.772544		0.17	0.108	0.611	0.534	0.692	0.531
0.244358	0.125764	1.03965	0.118814	0.60247	0.840685		0.088	0.05	0.505	0.079	0.163	0.628
0.320941	0.120011	1.71597	0.234098	0.204548	0.302603		0.058	0.07	0.537	0.219	0.704	0.485
0.0581786	0.131629	0.88051	0.420401	0.856825	0.409497		0.111	0.081	0.602	0.188	0.507	0.536
0.0886286	0.21396	0.756629	0.452185	0.575361	0.353352		0.051	0.065	0.614	0.488	0.373	0.555
0.124645	0.129789	1.04214	0.398563	0.330265	0.759429		0.069	0.168	0.621	0.514	0.361	0.74
0.120528	0.168152	1.67756	0.587564	0.147926	0.261651		0.067	0.154	0.557	0.367	0.624	0.727
0.0697625	0.133816	2.02981	0.179918	0.48514	0.0811826		0.035	0.133	0.646	0.238	0.696	0.383
0.0983508	0.131117	0.873517	0.135279	0.604285	0.606919		0.194	0.042	0.54	0.439	0.541	0.608
0.253026	0.124565	1.51921	0.371417	0.519691	0.519257		0.099	0.062	0.357	0.332	0.373	0.444
0.175511	0.139328	1.64677	0.169329	0.184799	1.28118		0.038	0.076	0.356	0.155	0.666	0.751
0.231797	0.134556	0.582719	0.105986	1.0891	0.910482		0.087	0.093	0.436	0.213	0.56	0.718
0.167192	0.14115	0.527077	0.149166	0.911631	0.350487		0.133	0.084	0.479	0.484	0.366	0.453
0.11315	0.0958422	2.27367	0.768098	0.237578	0.116334		0.058	0.171	0.647	0.469	0.286	0.316
0.087191	0.104443	0.984572	0.742289	0.153959	0.356049		0.066	0.063	0.109	0.355	0.372	0.416
0.0556621	0.149814	0.844205	0.286758	0.0930758	0.234865		0.031	0.075	0.577	0.332	0.568	0.531
0.17281	0.0435428	0.276053	0.295526	0.287765	0.433965		0.053	0.29	0.457	0.395	0.557	0.387
0.151979	0.048572	1.45318	0.328517	0.359072	0.354271		0.057	0.075	0.66		0.611	0.619
	0.0860065	0.80945		0.320875			0.065	0.079	0.663		0.392
	0.0501646	0.738483		0.651091			0.049	0.075	0.572		0.69
	0.0648427	1.48134		0.285458			0.052	0.062	0.668
		0.659592						0.011	0.664
		0.478754						0.035	0.685
		0.522746							0.553
		1.3062							0.447
		1.73612							0.699
									0.65
0.125436	0.166587	1.22825	0.527482	0.486746	0.7122
0.0683637	0.0798999	0.61397	0.318634	0.30008	0.499608
67	70	75	67	70	67
