# Supplementary material for: Accessibility of the unstructured α-tubulin C-terminal tail is controlled by microtubule lattice conformation
Source: eLife. 2026 Feb 9;14:RP109308. doi: 10.7554/eLife.109308 (PMC12885479; doi:10.7554/eLife.109308)
Supplement: Figure 5—source data 1. [file elife-109308-fig5-data1.xlsx]

## Sheet: Fig5B_Density-A1aY1
Fig5B_density dY			Fig5D_density CAPGly			Fig5F_intensity dY
TubA_WT	TubA_E254A		TubA_WT	TubA_E254A		Untransfected control	TubA_WT	TubA_E254A
1.88745	3.02196		0.128186	0.286866		0.190702	0.191438	0.447124
3.09961	2.82549		0.0622618	0.695183		0.209226	0.197817	0.537824
3.73608	2.64431		0.0495919	0.599328		0.207853	0.125984	0.588054
3.55294	3.52196		0.042107	0.239732		0.20514	0.498139	0.750133
2.24549	0.18		0.000320297	1.24569		0.143794	0.399297	1.26924
4.45569	5.13804		0.146632	0.495345		0.202764	0.238212	0.895722
4.69961	5.07137		0.0201715	0.0782184		0.0933486	0.30654	1.08674
1.63216	3.41216		0.0444418	1.01522		0.186949	0.230654	1.21003
1.49647	3.28941		0.417917	0.571948		0.163706	0.204791	2.70721
2.72784	4.15176		0.0286161	0.335772		0.205358	0.227162	1.59444
4.13176	4.59294		0.00751642	0.0177412		0.105863	0.168013	0.418975
0.918824	3.71373		0.0461461	4.57802		0.139527	0.382987	2.20316
0.54549	2.67922		0.0139693	2.84277		0.0975519	0.2589	1.24287
3.78902	3.83451		0.0840583	0.692406		0.0968581	0.206348	1.54537
3.79098	4.62706		0.136124	0.0753742		0.104684	0.293446	0.727324
2.37804	1.42863		0.823505	0.931778		0.197486	0.338225	0.403524
3.07843	1.14039		0.0966014	0.241763		0.204935	0.279182	0.768934
2.96588	4.18118		0.368971	0.522394		0.253266	0.150268	1.62169
4.0698	3.61843		0.15443	1.28623		0.331049	0.158494	1.53864
0.132941	2.69882		0.00838415	0.047668		0.276591	0.0747492	3.97937
1.62235	4.24078		0.132833	0.903725		0.167204	0.0665107	7.3032
2.7298	3.8851		2.10162	0.197107		0.376976	0.191612	0.876426
3.37255	2.24196		0.220171	1.55622		0.21275	0.13467	0.528937
3.03137	4.32314		0.0556295	0.144449		0.341613	0.207545	2.62053
0.133333	4.67059		0.0167517	0.451149		0.329617	0.221583	2.00609
0.23451	4.29922		0.0198835	0.129058		0.113859	0.153579	1.23043
2.18314	3.17922		1.06409	0.728848		0.208406	0.261363	1.72703
0.464314	3.84549		0.0455454	0.32915		0.206747	0.152816	2.97145
3.53176	4.33373		0.0228216	1.17213		0.102275	0.166713	0.813964
1.14039			0.0120667	1.05313		0.148245	0.127735	2.36584
1.1302			0.122367	1.38298		0.121547	0.121979	1.70141
2.29882			0.0524307	0.598638		0.124164	0.970532	1.58077
3.44			0.937917	0.286591		0.0791562	0.327417	1.42111
			0.193149	0.334293		0.105	0.301959	3.64636
			0.210759	0.048459		0.0738586	0.288577	2.59966
			0.0547244	0.200955		0.214063	0.14133	1.2122
			0.056223	0.0159052		0.182733	0.171191	2.01165
			0.10052	1.67721		0.248895	0.426543	0.951369
			0.0509673	0.0454915		0.245396	0.244342	0.936908
			0.109651	0.0836232		0.129271	0.20694	0.244779
			0.216431	0.104265		0.207745	0.279397	0.486274
			0.487082	0.0127281		0.117627	0.180524	0.478294
				0.238565		0.203149	0.14517	0.133777
				0.093413		0.414609	0.133132	0.799241
				0.0262987		0.396662	0.184369	1.04541
				0.047996		0.607537	0.345438	0.289814
				0.0239248		0.266812	0.485876	0.691185
				0.0126331		0.186143	0.630645	0.185063
				0.000629945		0.281498	0.304141	0.950544
				0.179261		0.225042	0.357876	1.0659
						0.970832	0.174812	0.767405
						0.901627	0.274163	0.979703
						0.262792	0.18147	1.89484
						0.174289	0.215577	2.6111
						0.239634	0.583209	1.74583
						0.234661	0.295458	0.869314
						0.258602	0.475538	0.676611
						0.0518638	0.503453	0.874426
						0.0992151	0.285761	1.24104
						0.254686	0.276109	0.914458
						0.247006	0.0827276	0.868404
						0.284904	0.0567085	1.02556
						0.0865642	0.196948	0.732545
						0.108437	0.136538	1.27264
						0.172945	0.207542	1.36038
						0.11814	0.200393	0.49394
						0.155529	0.165787	4.84418
						0.109196	0.597049	3.70121
						0.148151	0.280673	1.00422
						0.389805	0.287342	1.02826
						0.321648	0.50608	1.52953
						0.256138	0.368983	1.17365
						0.191123	0.385248	1.35252
						0.137862	0.623381	1.65208
						0.347989	0.214361	1.54652
						0.343361	0.379158	1.37589
						0.18932	0.0989546	0.970495
						0.241335	0.105918	1.59223
						0.241393	0.589357	2.79352
						0.161325	0.213355	0.570992
						0.425136	0.120228	2.26067
						0.417787	0.233845	1.47515
						0.293785	0.520558	0.768445
						0.587146	0.674971	1.39428
						0.0925422		1.43843
						0.0928264		2.32093
						0.15331		0.577818
						0.209125		0.993709
						0.192425		0.878146
						0.279503		0.674783
						0.21804		0.69096
						0.243251		5.65135
						0.226058		3.00702
						0.292148		1.34381
						0.288117
						0.278224
						0.216191
						0.180181
						0.230257
						0.118782
						0.213673
						0.141726
						0.371063
						0.312723
						2.28024
						0.25057	0.27826	1.46118
						105	84	94
