# Supplementary material for: Accessibility of the unstructured α-tubulin C-terminal tail is controlled by microtubule lattice conformation
Source: eLife. 2026 Feb 9;14:RP109308. doi: 10.7554/eLife.109308 (PMC12885479; doi:10.7554/eLife.109308)
Supplement: Figure 6—source data 1. [file elife-109308-fig6-data1.xlsx]

## Sheet: Fig.6G
Fig6B_intensity CAPGly			Fig6D_intensity YL1/2Fab			Fig6G_intensity YL1/2Fab
GMPCPP	GDP		GMPCPP	GDP		No 5C, No nucleotide No washout	+5C, +ADP, No washout	+5C, +ADP, Washout	+5C, +apo, No washout	+5C, +apo, Washout	+5C, +ATP, No washout
77600.2	55246.8		29065.3	34246.1		1291.22	947.93	1093.64	222.574	1829.25	1098.82
99195.2	65885.4		25796	35700.6		1675.18	598.682	1357.1	330.114	1772.46	1593.28
82018.7	63836.6		29819.5	34652.6		1182.89	869.319	2157.41	231.114	1724.66	2320.29
94237.4	60906		39300.9	42658.7		1661.25	906.88	1380.01	168.703	1687.67	1978.36
89349.5	60799.4		39449.2	41327.2		1359.21	1128.78	532.184	257.047	1652.57	2339.41
73170.7	71458.7		34447.8	48128.2		1454.29	813.933	921.535	247.101	1675.12	1680.79
59177.1	78413.9		41010.4	26400.4		1867.86	635.115	1359.13	182.248	1495.63	2194.65
46156.4	58603.5		37429.3	39680		1054.99	1216.66	928.498	334.721	2075.88	2461.62
92815.4	60643.2		29716.8	40659.4		712.387	945.376	1208.3	211.395	1839.31	2562.06
65934.4	63826.9		36452.5	40870.9		751.779	1271.09	1252.74	287.878	2059.59	2202.38
82984.1	57277.5		41748.9	35674.6		1053.21	783.63	1234.81	211.651	1855.98	2133.05
63830.7	58725.8		38719.5	48874		555.774	1083.58	1343.03	396.984	2201.67	2539.39
76689.6	90276		40899.7	51731.3		1123.12	1039.42	1519.37	383.886	1463.16	1750.9
76550.5	78146.8		45731.1	42769.6		635.41	1424.35	1342.93	418.76	1918.26	1975.23
62241.4	88366.8		76539.9	49311.1		1407.51	1105.62	1427.46	205.347	1945.99	2323.23
67774.2	76054.8		53325.4	48913.4		1635.52	946.887	1242.32	467.373	1701.39	2459.73
97122.9	67474.8		39359.9	49114.4		1238.92	649.654	1286.56	249.157	1822.83	1842.53
107986	62346.5		34984.3	40932.7		898.268	565.645	1211.82	63.238	1432.14	2024.88
76763.7	84996.9		51830.6	31867.6		661.918	760.373	974.183	350.483	1240.95	2879.25
77287	93599.7		49033.6	39293.5		1129.73	584.572	1375.83	520.515	1670.69	2126.8
98064.3	98735.2		41853.6	43187		1415	1102.65	1228.31	365.029	1452.73	2777.09
91770.2	110420		54348.5	35006.8		1535.02	918.297	1296.55	230.061	2475.77	2099.24
113136	99801.9		60464.5	43353.7		1355.31	817.111	1388.53	440.947	1597.34	2187.22
70184.9	110122		42149	34794.5		1659.02	1581.81	1325.27	278.6	2275.91	2160
93025.4	88364.4		44681.6	51288		613.075	1402.04	929.134	188.681	2115.36	2347.04
59258.8	104645		30840.7	48556.7		1308.19	1366.16	1187.04	390.267	2033	2223.71
80026.3	83935		32406	47025.4		1003.97	858.603	1244.16	494.993	1950.3	2461.18
73278.2	115418		48223.1	53161		896.613	981.982	1645.94	407.257	1600.27	1994.71
76384.8	125079		45480.9	54661.3		1150.22	926.789	1696.62	202.712	1304.19	1990.59
83238.7	75265.6		52681	40251.5		1346.67	1310.07	1266.65	388.686	1727.67	2381.95
83400.7	78080.3		49257	39708		1329.95	1409.51	1006.1	14.263	2153.94	1975.91
80386.4	79952		51200	31737.7		649.588	1219.82	1131.66	213.988	2219.52	2377.35
81741.5	102192		46710.4	56580		999.948	1401.26	1175.48	429.887	2094.89	2742.47
112537	93224		50256.9	57289.6		1533.91	1139.76	1360.78	397.449	2189.41	2376.51
77291.2	52713.8		53228.9	38755.9		452.955	1391.21	1554.96	505.845	2881.86	2582.18
64435.8	73237.4		53589	49338.8		1287.01	1456.9	1278.96	461.274	1739.87	2505.72
85834	72451.2		67061.7	45587.7		1246.61	1006.46	1319.69	407.149	1246.92	2597.5
96932.4	92191		51475.4	58001.9		1797.28	1552.55	1165.05	377.447	1350.17	3516.15
127364	68542.6		43124.8	62604.9		1091.28	552.837	1490.74	80.221	1522.91	2234.14
102862	81478.1		45305.2	49885.4		1535.8	515.647	1087.61	166.326	2369.2	1812.66
108024	73096.9		49506.4	48181.3		1446.65	720.801	1473.24	167.95	2029.19	2364
105090	110056		59907.7	56419.3		793.806	816.857	1216.82	317.753	2507.88	2167.97
73519.2	113501		49062.8	36909.1		1070.09	597.259	1022.36	255.462	1446.29	3171.08
	115721		63483.8	59219.2		1881.38	785.601	1275.46	170.221	1263.49	2841.3
	105953		48370.6	43472.7		1189.77	867.263	1520.47	187.663	2678.25	1809.16
	117897		65748.9	50428.8		1537.69	742.823	1466.14	247.548	1894.87	2581.58
	81120.3		45682.8	69519.3		1302.55	747.034	959.116	310.885	2072.93	2194.69
			50782.4	46033.3		1685.63	719.486	1160.67	353.678	1556.61	1914.54
			56179.7	42483.1		1657.46	539.315	810.293	283.908	2335.7	1958.46
			44005.5	41312.2		997.962	519.853	1173.29	286.363	1396.27	2067.46
						1167.07	465.24	1575.95	426.312	1626.29	1747.82
65081	75940.2		16851.5	17483.9		1948.86	471.766	1365.41	268.291	2336.41	2985.61
96620.7	98962.9		15180.4	18248.9		1072.96	590.186	1256.53	279.308	1708.5	2822.81
80906.1	109473		20570.2	22045.2		1114.5	1016.45	959.703	689.902	2582.72	2475.93
90139.4	76243.4		21480.3	20840.4		978.475	650.973	1179.34	247.691	1978.43	2241.91
91720	101040		17550.3	26335.6		1292.86	500.01	1511.79	328.631	2691.04	876.028
78823.8	121608		19658.7	22552.6		893.108	594.924	825.663	479.402	1854.2	1717.65
123932	103520		25499.7	22227.6		2168.99	658.187	1326.11	460.41	1333.44	1911.06
94233.8	120974		24488.1	24763.6		894.711	611.25	619.81	361.594	2040.03	2151.59
94735.9	84999.5		20153.3	23459.4		1060.31	306.621	928.456	518.992	1691.8	1836.35
152169	87658.6		19174.2	20243.9		1812.25	523.182	1166.48	566.791	1628.74	1434.38
122922	92263.9		34019.5	25006.9		1373.95	579.13	1295.15	410.859	1624.12	1959.03
86479.6	91521.3		28334.9	31497.7		1008.97	470.151	1088.09	553.811	1601.81	2003.17
89753.6	95610.8		36807	44091.5		1018.77	528.103	1581.77	321.76	2502.15	1763.57
114619	89024.5		34103.8	35260.7		1486.02	321.301	1112.52	408.908	2150.56	2207.78
113567	127287		38999.9	36559.9		1130.67	569.084	1129.56	500.438	1467.61	2296.39
106347	92932		34909.8	42121.7		867.893	719.908	1014.36	298.033	1466.16	1134.01
133844	120680		36963.5	36576.5		614.235	755.377	893.62	317.952	1538.2	1601.08
116058	105141		34861.4	40206		1098.14	568.61	1300.62	198.33	1928.35	1577.96
111579	89216.1		38807.2	32886		481.618	840.914	958.415	239.54	1816.91	1899.96
83826	77186.8		36054.3	34095.2		850.748	719.919	948.704	543.372	1546.79	1585.98
109644	95300.3		40739.5	36263.5		1055.09	567.056	860.209	378.454	1679.22	2150.34
112773	105123		37791.4	32870.2		1206.92	737.864	726.392	426.918	1583.81	1749.66
105216	85663.3		40433.2	29658.6		1207.1	495.845	1104.48	406.025	1739.48	2020.81
109163	107171		37667.5	30073.3		1200.55	367.858		529.717	2416.94	1737.33
113459	114174		34534.5	46768.5		1241.22	939.187		456.314	2237.51	2563.28
146112	105346		44284.8	38886.9		653.691	762.268		420.402	1528.35	2150.44
125900	106362		47958.2	41156.4		998.908	436.156		400.374	1652.16	2003.06
139369	71343		54120.3	46230.1		683.604	434.776		446.867	1662.47	2267.58
118421	97336.6		49675.6	43315.7		926.37	590.657		426.328	1914.56	2198.25
93631.2	120892		35641.5	46790.5		930.27	1139.61		499.197	1887.33	2059.85
110427	85868.6		36729.1	45030		788.717	723.955		436.594		1130.1
87989.8	154199		40829.5	44897.3		1222.67	560.367		328.481		2624.22
87391.4	121079		41558.8	43196.2		1039.82	481.783		573.686		2496.75
102184	103245		49722.4	41241.5		616.723	861.43		438.547		2498.91
61455	134945		47845.5	53133.9		881.39	1007.76		469.968		2071.93
99369.8	173449		52171	40359.7		1328.94	419.36		601.529		2560.05
75356.9	142688		48681.4	51239.2		1136.49	402.201		625.245		2411.47
146231	108995		54767.2	46452.6		1114.54	655.563		366.558		3513.28
102286	114042		43030.5	44486.4		755.028	1051.97		398.986		2123.69
83660.2	124282		48535.3	46608.1		926.403	866.127		640.588		1484.6
82684.8	116605		49702	48369		805.838	661.054		575.904		2483.22
103608			45033.2	51124.7		1376.05	532.816		560.25		2776.52
131363			42014.9	39313.5		1327.8	571.014		564.942		2887.88
65563			59393.4	55750.7		1125.52	397.865		613.206		2258.34
74927.9			51934	57889.7		1462.27	417.376		639.166		3170.01
86138.6			62032.3	52213.8		906.17	601.437		478.358		3185.74
82491.7			56936.5	48322.9		894.555	589.023		750.51		2147.61
93951.9			56204.2	64951.7		1102.82	570.001		543.14		2116.29
90425.3			54048.5	47220.5		1776.35	673.699				2871.47
66538.8			54167.5	58627.7		1329.56	795.325				3026.47
						1299.5	816.97				2267.8
56301.1	34144		37537.9	40746.2		1101.72	592.023				2059.64
54503.4	38915.8		46436	49043.5		1236.21	595.809				3063.11
45575.2	37449.9		37021.8	48643		1103.13	715.599				1668.96
54875.4	35089.7		37455.7	29760.5
55215.7	40021.8		40227.3	45286.8
50747.9	39373.5		46517.9	47985.2
49191.2	51558.5		48904	48436
28444.6	55697.4		46234.3	46229.2
29714.5	43632.4		39069.1	54439.5
25893.6	48839.2		40011.4	38959.5
35201.1	42015.2		46132.4	39816.8
30157.9	41221.3		51837.7	48819.4
28430.6	45694.1		56401.8	58157.6
32355.5	52054.3		44323.6	42434.8
46533.6	28666.1		47003.3	52926
31211	22745		48688.2	47990
42380	31772.1		58896	63132.9
38899.1	33339.5		62623	57766
30665.7	40309.8		63163.6	65896.9
26498.7	36048.8		49763.1	62611.9
30080.6	32297.8		48506.9	57232.9
39892.3	32809.1		52658.7	49102.4
39292.5	36837.6		62424.4	57335.5
40169	48735.4		56579.9	74133.1
33254.5	47353.1		55046	89002
29933.7	44547.3		55869	66536.9
41966.9	43792.9		58986.9	62929
40299.8	49784.4		54972.9	76467.5
44538.6	46564.4		50304.3	75527.3
40514.9	43182.4		53943.9	67930.3
35488.5	29018.9		48105.5	49583.2
29553.8	45482.1		41501.8	68425.4
36817.5	54957.1		49715.2	74028.1
48048	54443.6		63066.2	108534
39974.3	47330.8		57429	114459
62716.3	47588.2		61694
53967.7	63296.5		65990.4
34339.7	62385.6		63602.1
68742	54562.9		60696.6
			51603
			57621.6
			71056.4
			58369.5
			61536.3
			63623.1
			54841.8
			78226.3
			78578.6
			73725.4
			62749.5
