# Supplementary figures and images for: Accessibility of the unstructured α-tubulin C-terminal tail is controlled by microtubule lattice conformation
Source: eLife journal article supplement (doi:10.7554/elife.109308), 2025-10-31

Figure 1E

Blot YL1/2 IgG

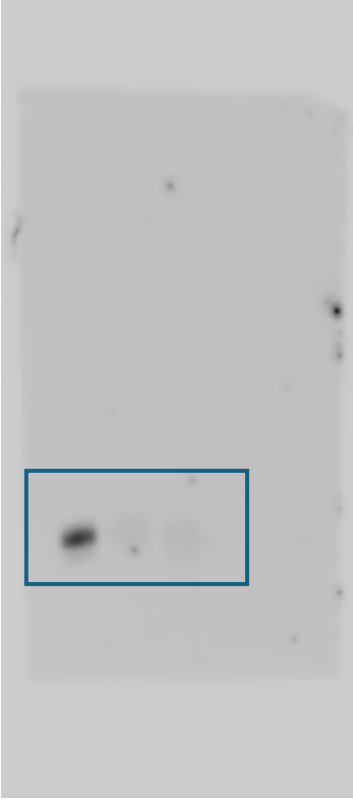

blot rMAb-YL1/2

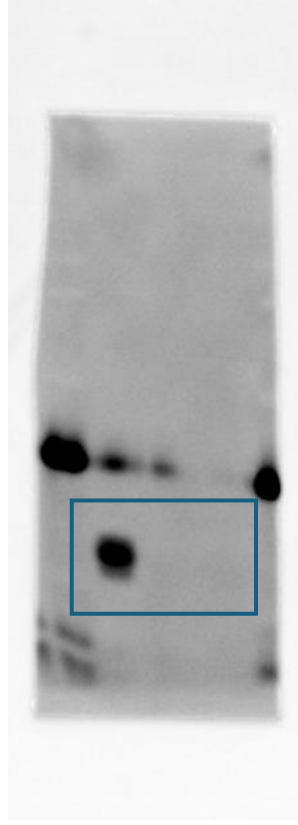

blot YL1/2<sup>Fab</sup>

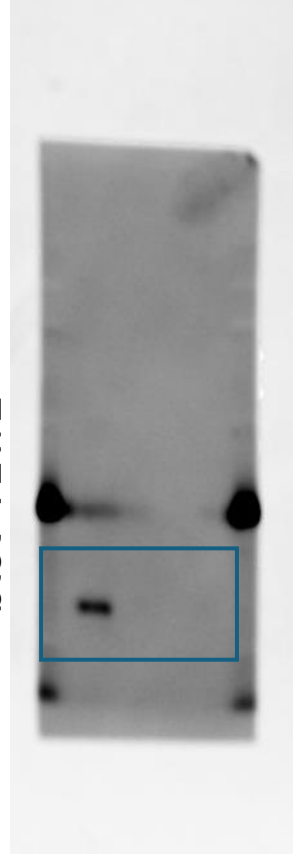

blot GST

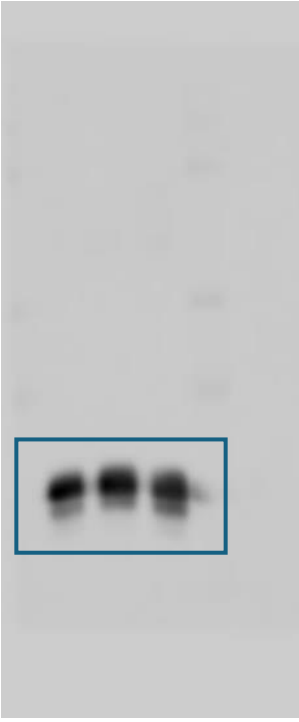

blot GST

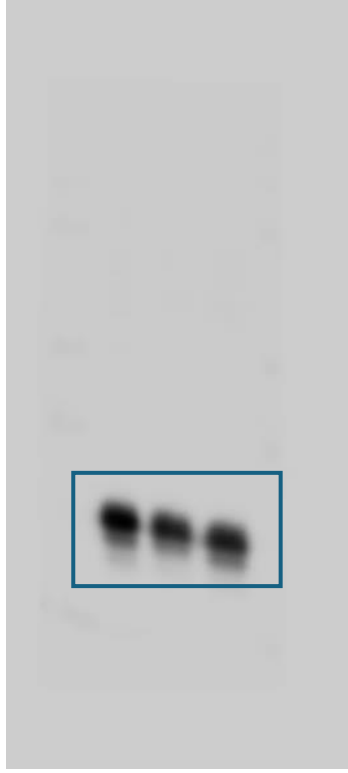

blot GST

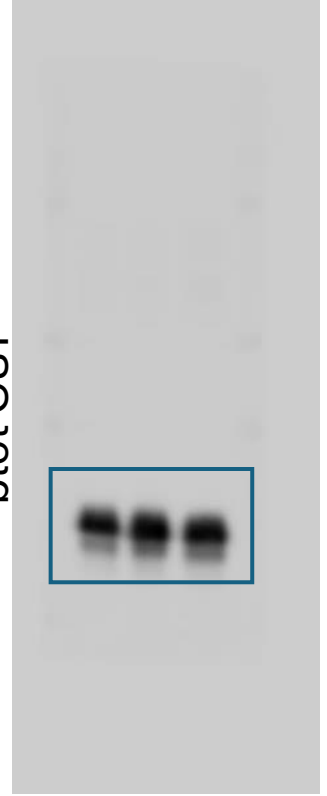

Supplement: fig1-data1 [file Figure1-sourcedata1-labelled.pdf › Figure1-sourcedata1-labelled/Figure1-sourcedata1-labelled.pdf]

Fig1-FigSupp1B

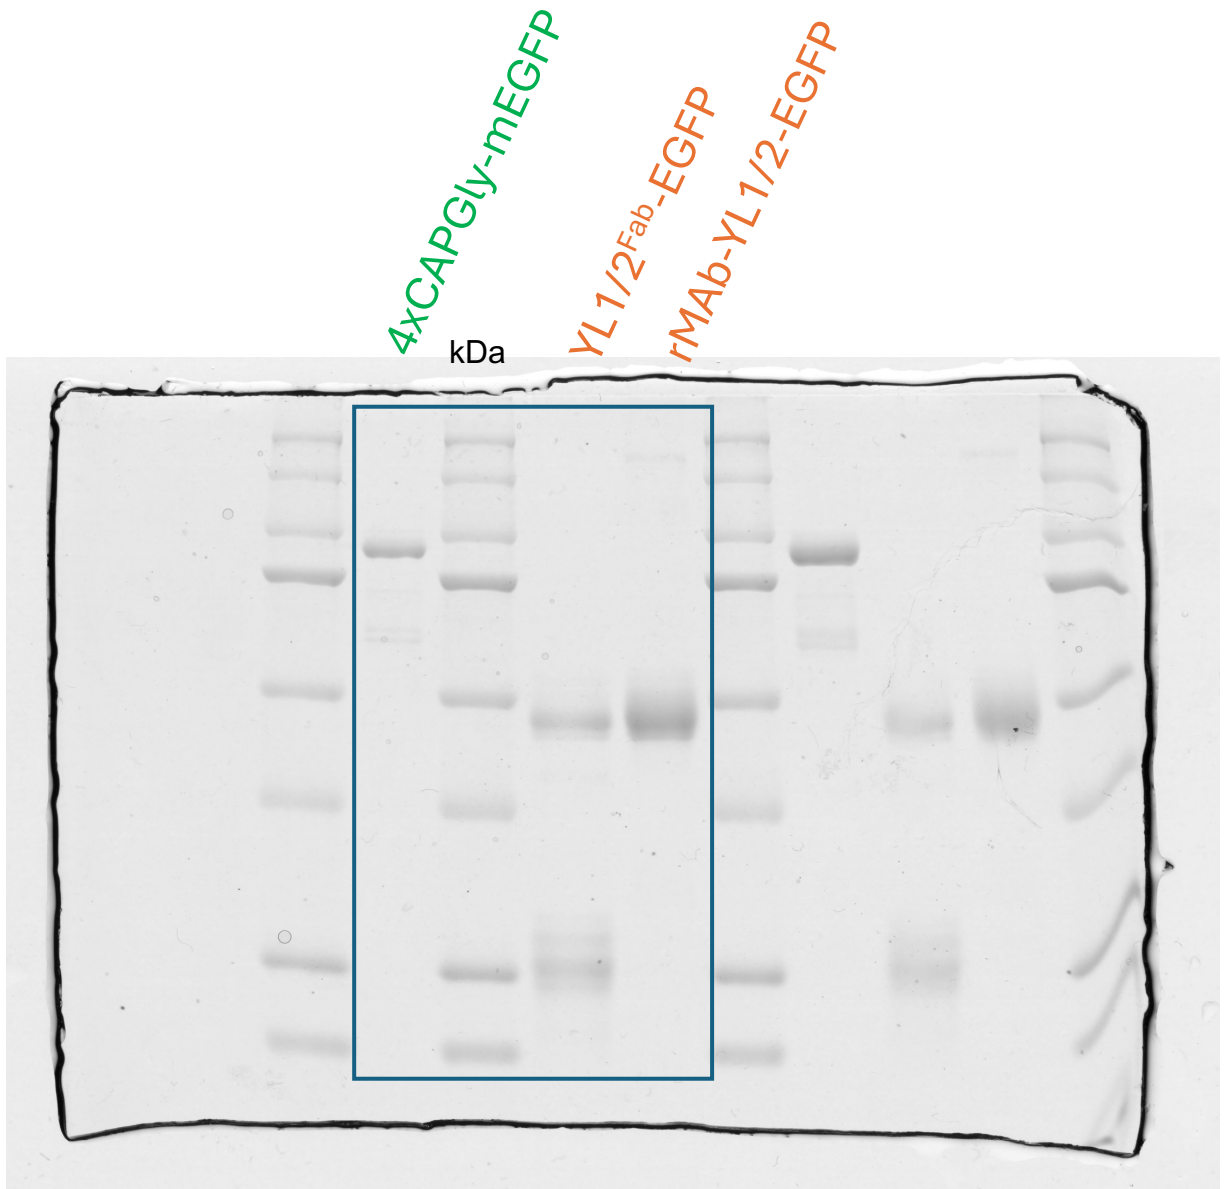

Fig1-Supp1C

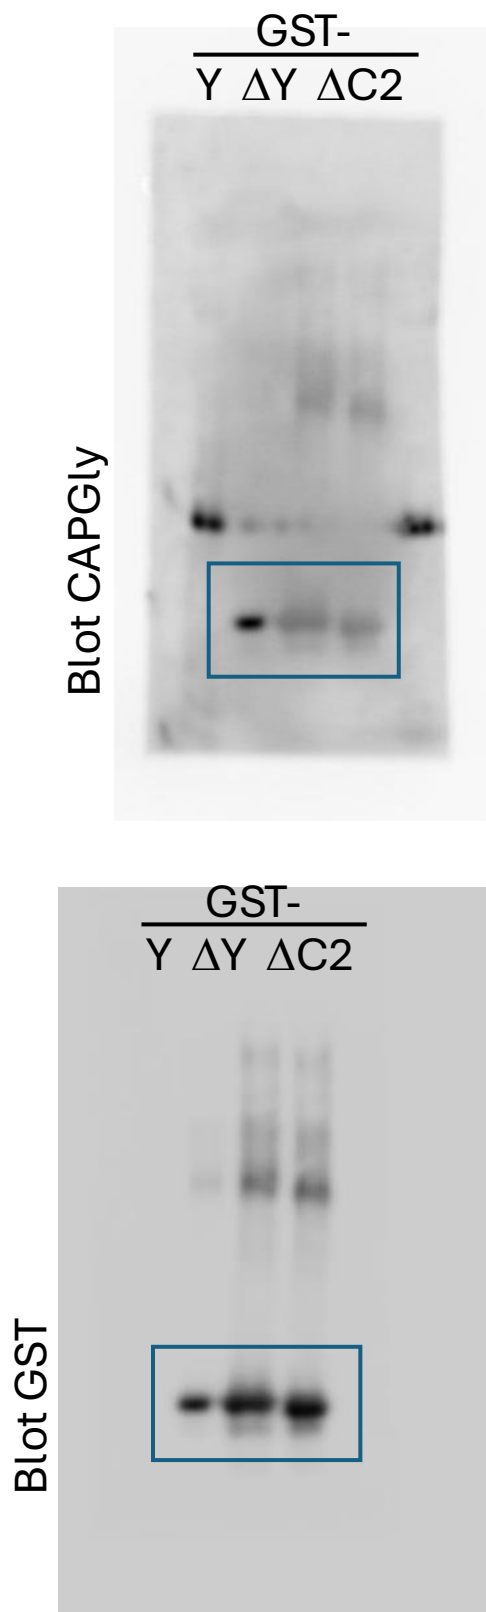

Supplement: fig1-figsupp1-data1 [file Figure1-FigSupp1-sourcedata-labelled.pdf › Figure1-FigSupp1-sourcedata1-labelled/Figure1-FigSupp1-sourcedata-labelled.pdf]
